# Supplementary material for: Facilitated Adsorption of Mercury(II) and Chromium(VI) Ions over Functionalized Carbon Nanotubes
Source: MDPI journal article supplement (doi:10.3390/toxics11060545), 2023-06-20
Supplement: s1 [file s1]

# Supplementary Materials: Facilitated Adsorption of Mercury(II) and Chromium(VI) Ions over Functionalized Carbon Nano-tubes

Gururaj M. Neelgund, Erica A. Jimenez, Ram L. Ray and Mahaveer D. Kurkuri

**Table S1.** Parameters calculated from the intra-particle diffusion plot provided in Figure S2. .

| Adsorbent | Intra-particle diffusion model          |         |                |                                         |        |                |
|-----------|-----------------------------------------|---------|----------------|-----------------------------------------|--------|----------------|
|           | $K_{id-1}$ [mg/(g.min <sup>0.5</sup> )] | c       | R <sup>2</sup> | $K_{id-2}$ [mg/(g.min <sup>0.5</sup> )] | c      | R <sup>2</sup> |
| Hg(II)    | 0.5177                                  | -0.3402 | 0.9841         | $6.29 \times 10^{-3}$                   | 2.4390 | 0.3532         |
| Cr(VI)    | 0.4373                                  | -0.5877 | 0.9793         | $1.39 \times 10^{-2}$                   | 2.3586 | 0.6600         |

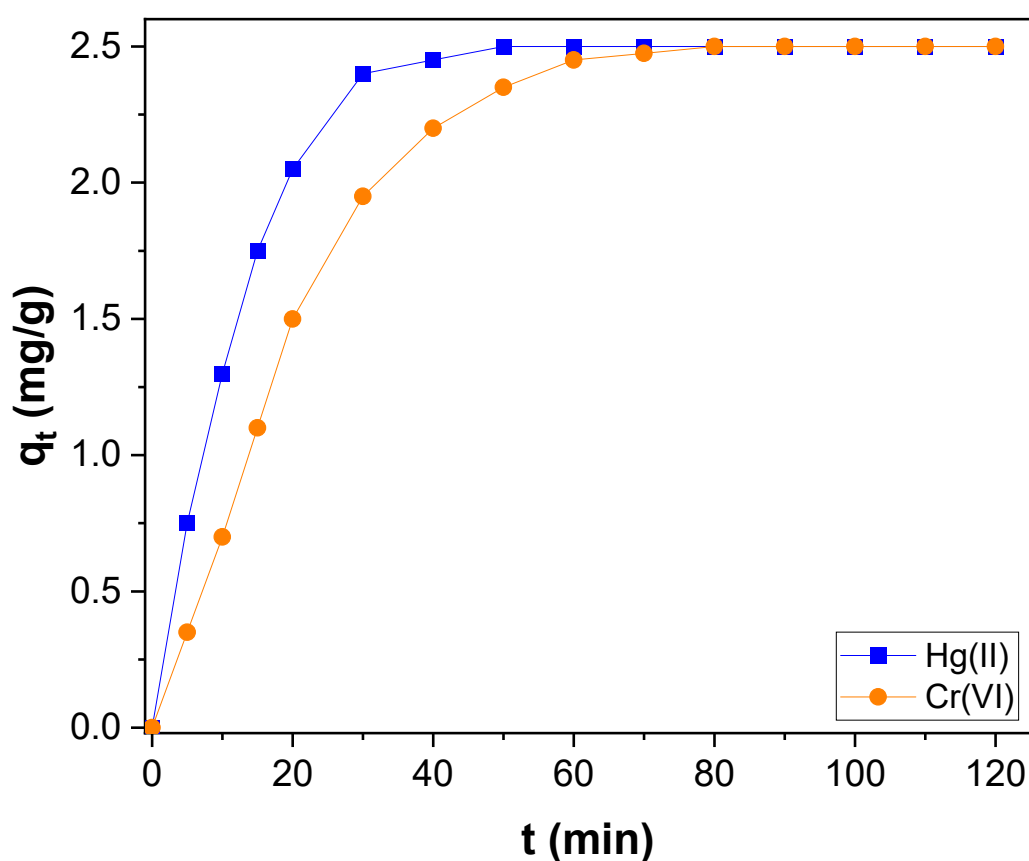

**Figure S1.** The plot perceived  $q_t$  as a function of time for Hg(II) and Cr(VI) adsorption over CNTs-PLA-Pd.

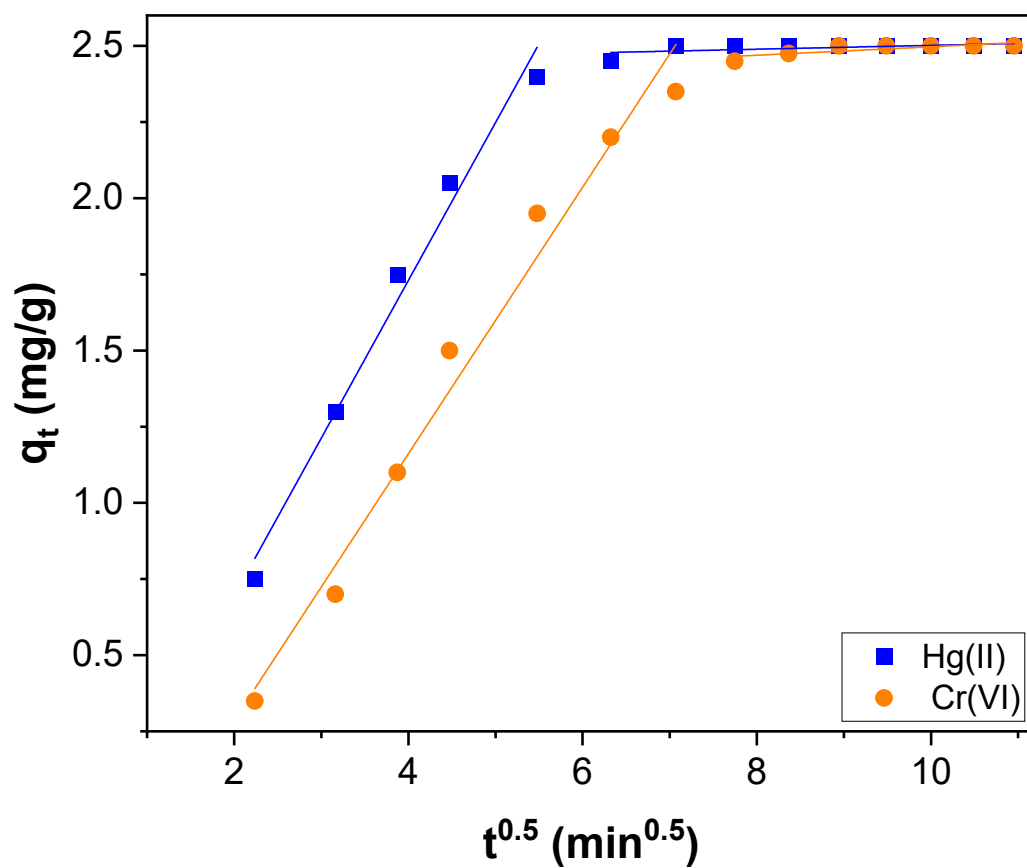

**Figure S2.** The Intraparticle diffusion model for Hg(II) and Cr(VI) adsorption over CNTs-PLA-Pd.
